# Supplementary material for: Nanowire arrays restore vision in blind mice
Source: PubMed Central journal article supplement (PMC5840349; doi:10.1038/s41467-018-03212-0), 2018-03-06
Supplement: 41467_2018_3212_MOESM2_ESM.pdf [file 41467_2018_3212_MOESM2_ESM.pdf]

## **Description of Additional Supplementary Files**

File Name: Supplementary Movie 1

Description: Calcium imaging of light responses in population retinal ganglion cells.

File Name: Supplementary Movie 2

Description: Pupillary light reflex to UV light in blind and wild-type mice.

File Name: Supplementary Movie 3

Description: Pupillary light reflex to green light in blind and wild-type mice.
